# Supplementary material for: A Genome-Wide Association Study of Vertical Cup-Disc Ratio in a Latino Population
Source: PubMed Central journal article supplement — Invest Ophthalmol Vis Sci. 2017 Jan;58(1):87–95. doi: 10.1167/iovs.16-19891 (PMC5231910; doi:10.1167/iovs.16-19891), 2017-01
Supplement: iovs-57-15-29_s01.pdf [file iovs-57-15-29_s01.pdf]

Supplementary Figure 1. A quantile-quantile (Q-Q) plot of the  $-\log_{10}(P$  values).

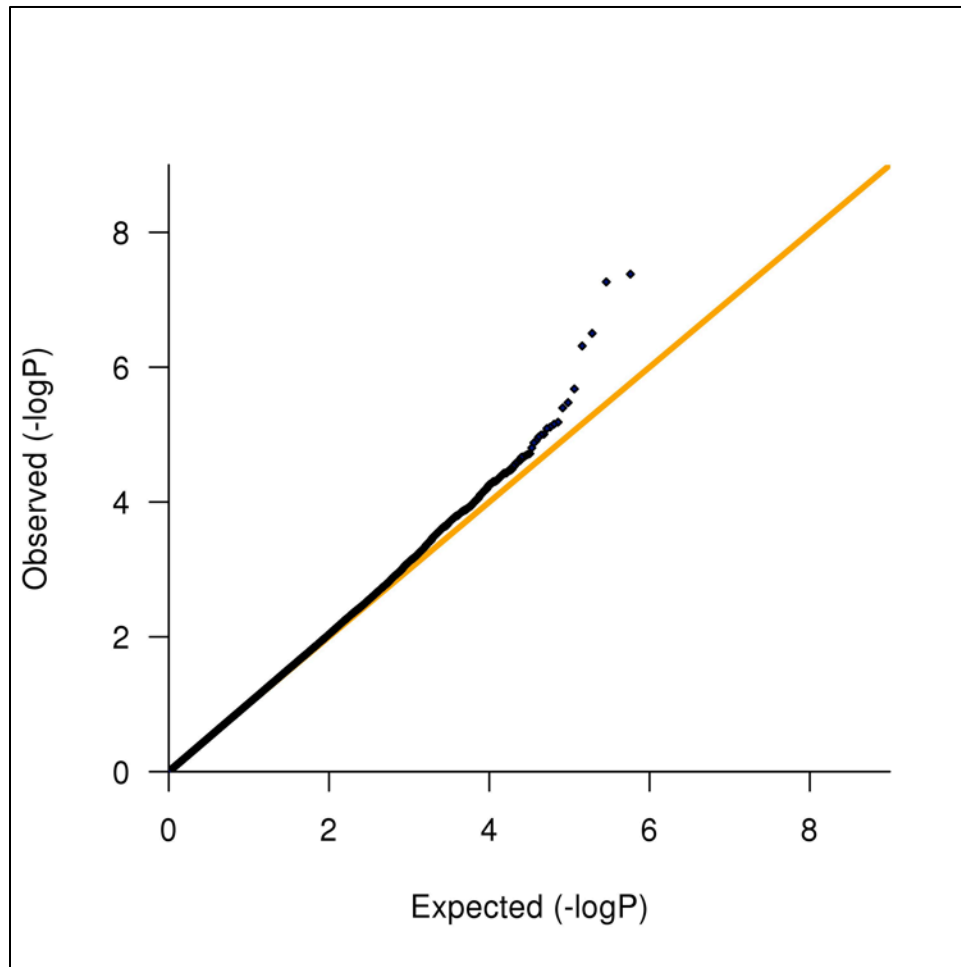

For the study participants included in the discovery set, the  $-\log_{10}(P$  values) for the 576,798 genotyped SNPs are plotted against the corresponding expected  $-\log_{10}(P$  values) ( $\lambda = 1.03$ ).
