# Supplementary material for: A Genome-Wide Association Study of Vertical Cup-Disc Ratio in a Latino Population
Source: PubMed Central journal article supplement — Invest Ophthalmol Vis Sci. 2017 Jan;58(1):87–95. doi: 10.1167/iovs.16-19891 (PMC5231910; doi:10.1167/iovs.16-19891), 2017-01
Supplement: iovs-57-15-29_s02.pdf [file iovs-57-15-29_s02.pdf]

Supplementary Figure 2. Ancestral plot for our Latino sample.

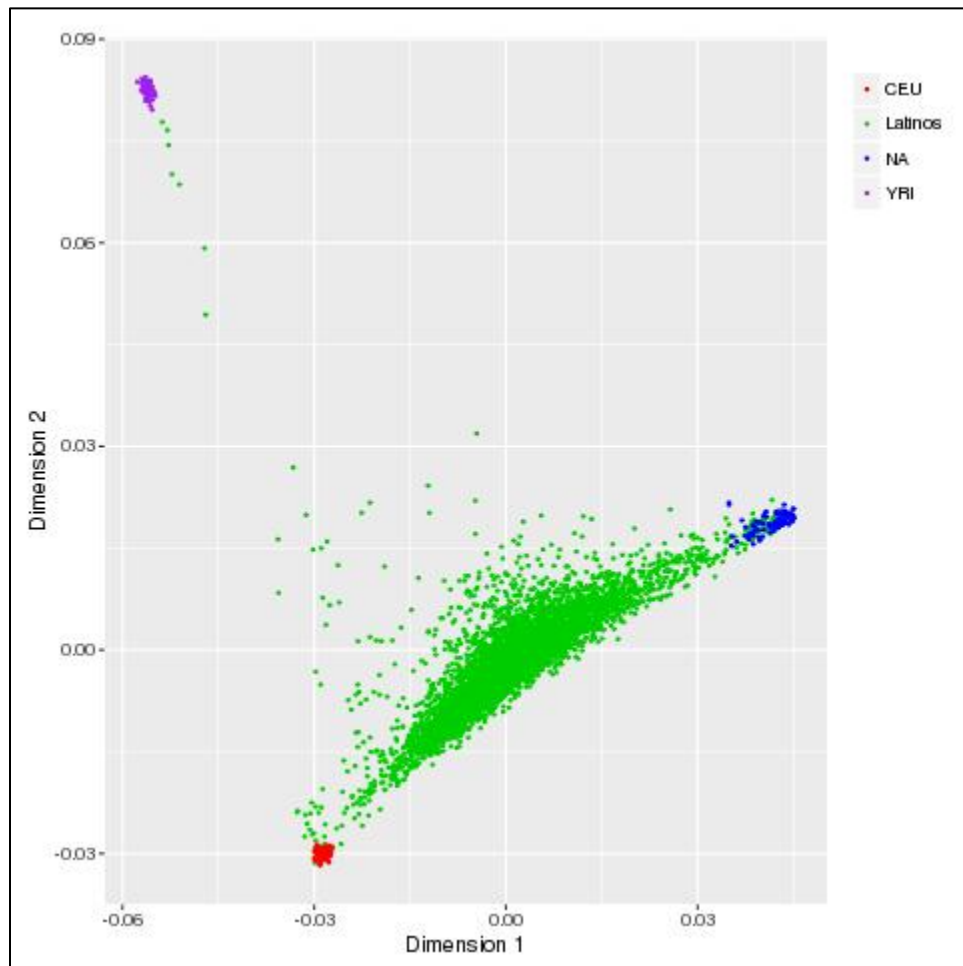

The first two principal components of genetic ancestry for our Latino sample are plotted with three ancestral populations. Abbreviations: CEU, CEPH in Utah residents; NA, Native Americans; YRI, Yoruba in Ibadan, Nigeria.
