# Supplementary material for: A Genome-Wide Association Study of Vertical Cup-Disc Ratio in a Latino Population
Source: PubMed Central journal article supplement — Invest Ophthalmol Vis Sci. 2017 Jan;58(1):87–95. doi: 10.1167/iovs.16-19891 (PMC5231910; doi:10.1167/iovs.16-19891), 2017-01
Supplement: iovs-57-15-29_s03.pdf [file iovs-57-15-29_s03.pdf]

Supplementary Figure 3. Genetic ancestry estimates for our Latino sample.

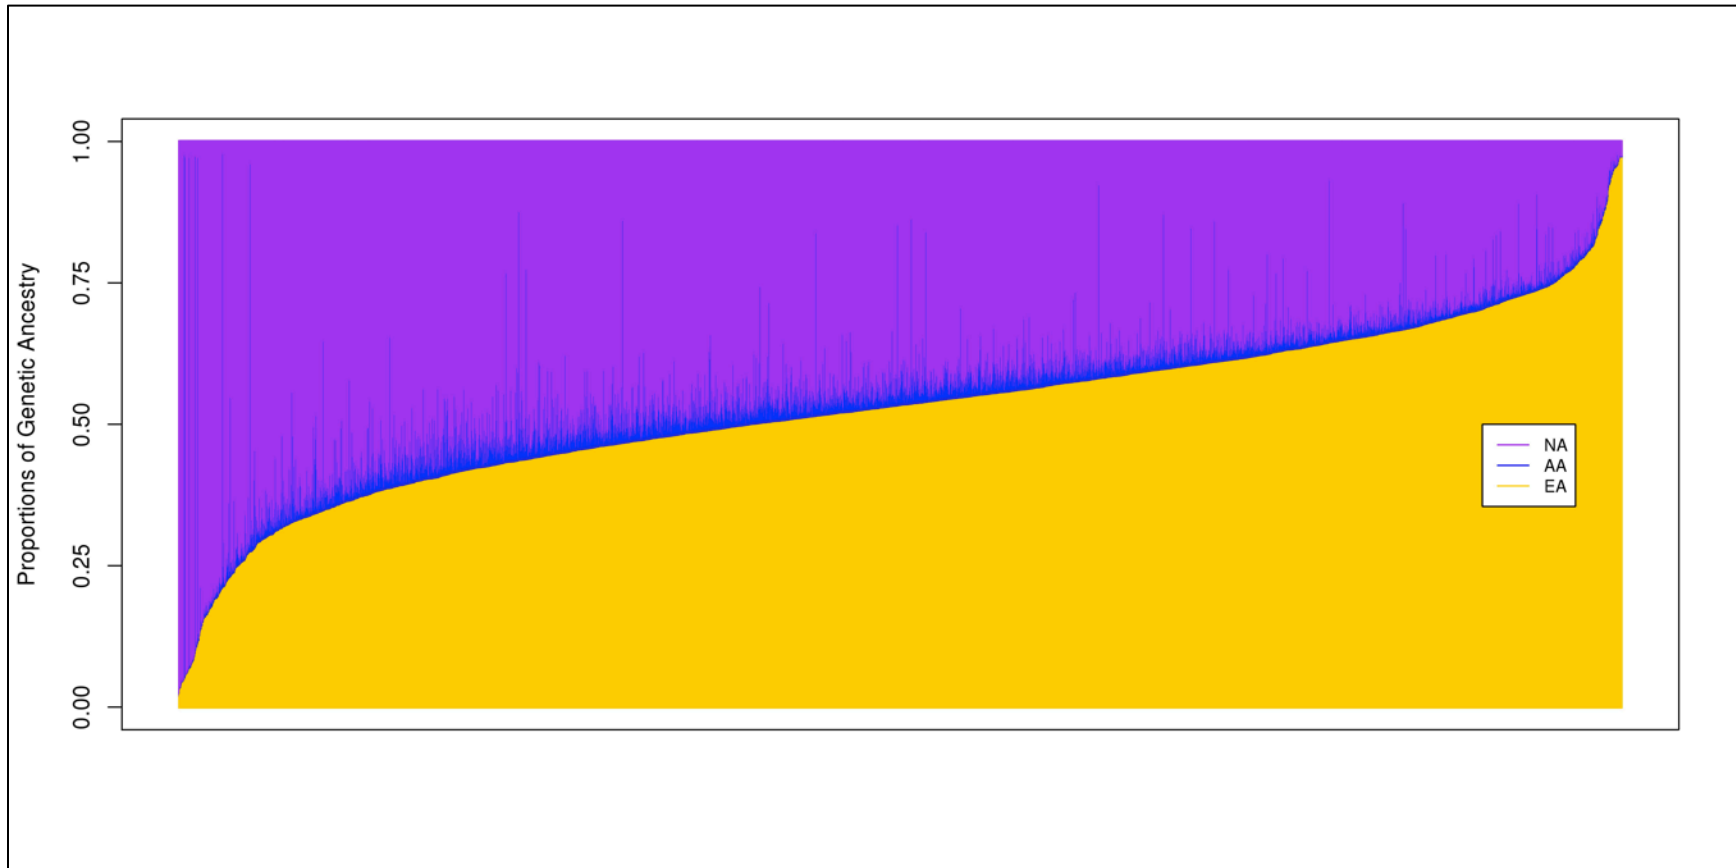

Each colored vertical bar represents a subject in this plot, corresponding to the proportion of genetic ancestry for each individual from the three ancestral populations. European, African, and Native American ancestries are colored as dark yellow, blue, and purple, respectively. The x-axis and y-axis represent the subjects and the proportion of genetic ancestry, respectively. In this plot, subjects have been sorted by European ancestry to aid in visualization. Abbreviations: EA, European ancestry; AA, African ancestry, NA, Native American ancestry.
